**Supplementary Table. Associated pathologies which were non inclusion criteria: the International Classification of Diseases (ICD-10) codes.**

| <b>Variable name</b>                                  | <b>Description</b>                                                                                                              | <b>ICD-10 codes</b>                                                         |
|-------------------------------------------------------|---------------------------------------------------------------------------------------------------------------------------------|-----------------------------------------------------------------------------|
| <b>Diabetes</b>                                       | Gestational diabetes or pre-pregnancy diabetes                                                                                  | [E10;E14],H360,N083,O24,[P700;P701]                                         |
| <b>Hypertensive disorders</b>                         | High blood pressure (pre-pregnancy diabetes or pregnancy-induced hypertension, pre-eclampsia and eclampsia)                     | [I10;I15],[O10;O11],[O13;O16],P000                                          |
| <b>Pre- eclampsia</b>                                 | Pre- eclampsia other than moderate                                                                                              | O14,O11                                                                     |
| <b>Eclampsia</b>                                      |                                                                                                                                 | O15                                                                         |
| <b>Premature separation of placenta</b>               |                                                                                                                                 | O45                                                                         |
| <b>Placenta previa</b>                                |                                                                                                                                 | O44,P020                                                                    |
| <b>Haemorrhagic placenta previa</b>                   |                                                                                                                                 | O441                                                                        |
| <b>Second and third trimester haemorrhage</b>         |                                                                                                                                 | [O45;O46],O441,P021                                                         |
| <b>Infection of the amniotic fluid</b>                | Infection of amniotic sac and membranes                                                                                         | O411                                                                        |
| <b>Genital infection</b>                              | Any infection of the genital tract during pregnancy                                                                             | O235,A510                                                                   |
| <b>Urinary infection</b>                              | Urinary tract infection during pregnancy                                                                                        | [O230;O234]                                                                 |
| <b>Urogenital infection</b>                           | Urogenital system infection during pregnancy                                                                                    | O23,A181,A510,[A540;A542],[A560;A562],A590,A600                             |
| <b>Infectious diseases complicating pregnancy</b>     | Mother's Infectious and parasitic diseases complicating pregnancy or aggravated by pregnancy or at the source of obstetric care | O23,O98,Z21,A34,[A15;A19],[A50;A64],[B15;B19],[A80;B09],[B25;B34],Z225,P002 |
| <b>Fetal growth restriction</b>                       |                                                                                                                                 | O365,[P050;P051],Z364                                                       |
| <b>Hydramnios</b>                                     |                                                                                                                                 | O40                                                                         |
| <b>Abnormalities of the female reproductive tract</b> | Known or suspected abnormalities of the maternal pelvic organs                                                                  | O34,[Q50;Q52]                                                               |

|                                        |                                                                                                            |                                                                                                                                                                                                                                                                                                                                                                                                                                                      |
|----------------------------------------|------------------------------------------------------------------------------------------------------------|------------------------------------------------------------------------------------------------------------------------------------------------------------------------------------------------------------------------------------------------------------------------------------------------------------------------------------------------------------------------------------------------------------------------------------------------------|
| <b>Infant congenital abnormalities</b> | All congenital abnormalities according to EUROCAT classification, excluding minor abnormalities when alone | abnormalities codes:<br>[Q00;Q99],D215,D821,D1810,P350,P351,P371<br>minor abnormalities codes:<br>Q0782,[Q101;Q103],Q105,Q135,[Q170;Q175],Q179,[Q180;Q182]Q1880,Q189,Q2111,Q270,[Q314;Q315],Q320,Q331,[Q381;Q382],[Q384;Q387],[Q400;Q401],Q4320,Q4021,Q430,Q4381,Q4382,Q523,Q525,Q53,[Q5520;Q5521],Q610,Q627,Q633,[Q653;Q656],[Q662;Q669],[Q670;Q678],Q680,Q7400,[Q752;Q753],Q760,Q7643,Q765,Q7660,Q7662,Q7671,Q825,Q8280,Q833,Q845,Q899,[Q950;Q951] |
| <b>Preterm labor without delivery</b>  | Recorded in previous hospitalization of the same pregnancy                                                 | O60.0x                                                                                                                                                                                                                                                                                                                                                                                                                                               |
| <b>Premature rupture of membranes</b>  | Premature rupture of membranes                                                                             | O42,O756                                                                                                                                                                                                                                                                                                                                                                                                                                             |
